# Supplementary material for: Long COVID exhibits clinically distinct phenotypes at 3–6 months post-SARS-CoV-2 infection: results from the P4O2 consortium
Source: PubMed Central journal article supplement (PMC11043734; doi:10.1136/bmjresp-2023-001907), 2024-04-24
Supplement: bmjresp-2023-001907supp001.pdf [file bmjresp-2023-001907supp001.pdf]

## Supplementary Tables

Table S1: All variables that were used to create the clusters.

| Patient characteristics/co-morbidities | Questionnaires | Lung function | Long COVID symptom categories | Acute phase characteristics |
|----------------------------------------|----------------|---------------|-------------------------------|-----------------------------|
| BMI                                    | FSS            | FEV1          | Fatigue                       | Oxygen received (type)      |
| Age                                    | PROMIS         | FVC           | Respiratory                   | Hospitalized                |
| Sex                                    | PC-PTSD-5      | FEV1/FVC      | Neurological                  | Hospital duration           |
| Asthma                                 | EQ5D           | DLCO          | Cardiovascular                | Thrombosis                  |
| COPD                                   | CLCIC          |               | Gastrointestinal              | Pulmonary embolism          |
| CVD                                    |                |               | Other                         |                             |
| Diabetes                               |                |               |                               |                             |

BMI: body mass index, COPD: chronic obstructive pulmonary disease, CVD: cardiovascular disease, FEV1: forced expiratory volume, FVC: forced vital capacity, DLCO: diffusion capacity of the lungs for carbon monoxide.

## Supplementary Figures

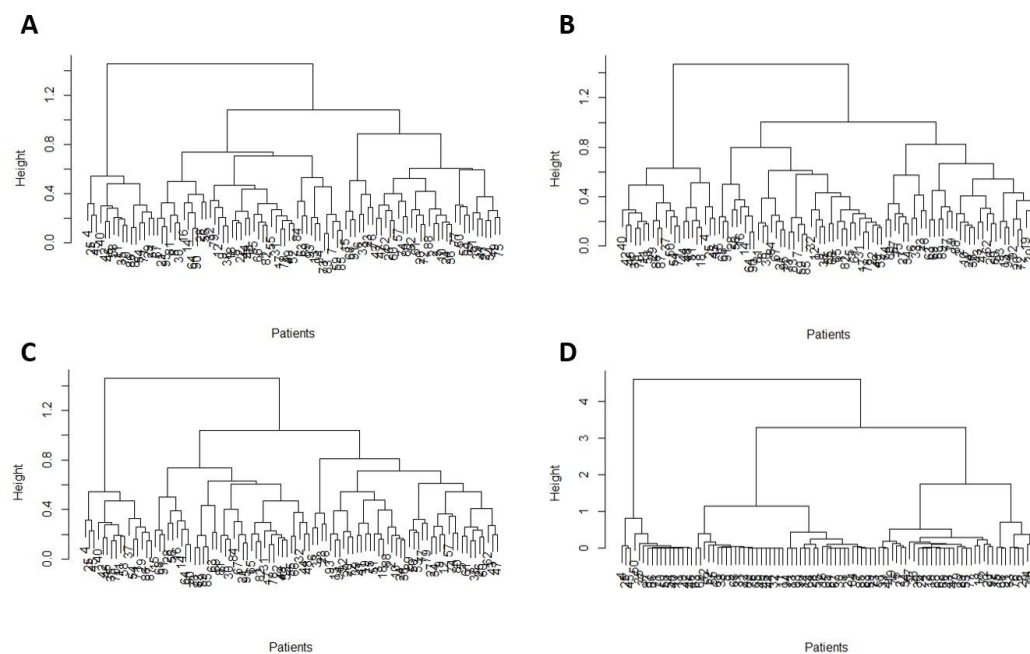

Figure S1: Dendrograms from hierarchal clustering of individual imputed data sets (A-C) and the dendrogram from the consensus clustering (D).

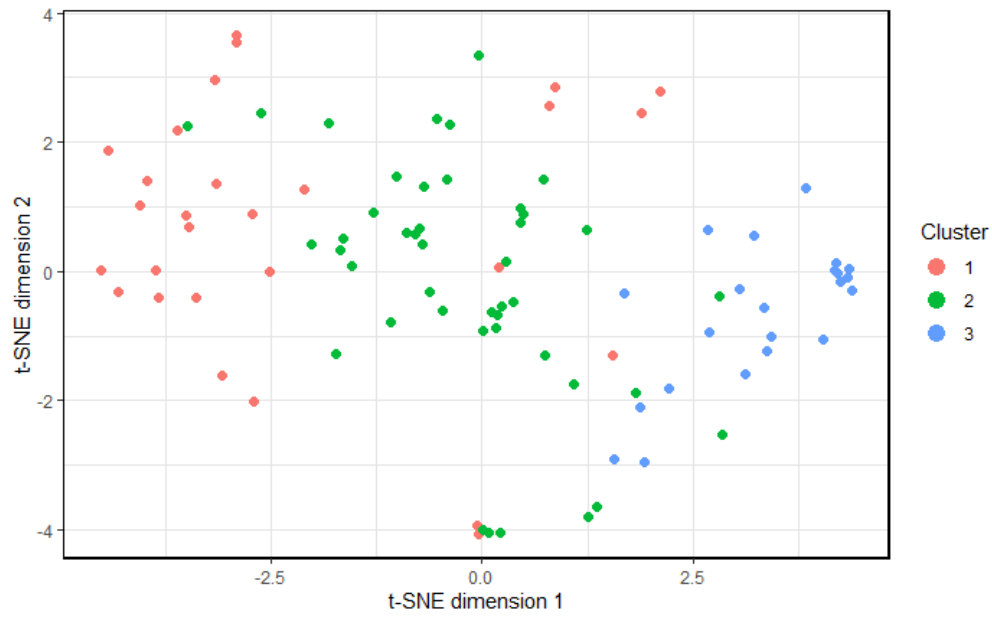

Figure S2: t-SNE plot showing the separation of the clusters created by the PAM clustering method projected on a 2-Dimensional space.
